# Supplementary material for: Signal Transducer and Activator of Transcription 3 (STAT3) Suppresses STAT1/Interferon Signaling Pathway and Inflammation in Senescent Preadipocytes
Source: PubMed Central journal article supplement (PMC7927067; doi:10.3390/antiox10020334), 2021-02-23
Supplement: antioxidants-10-00334-s001.pdf [file antioxidants-10-00334-s001.pdf]

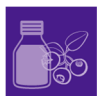

## SUPPLEMENTARY TABLES AND FIGURES

**Table S1.** Primers used for gene expression analysis in 3T3-L1, Stromal Vascular Fraction (SVF)-derived from mice and human samples.

| Gene Symbol         | Accession Number | Forward Primer (5'-3')  | Reverse Primer (5'-3')  |
|---------------------|------------------|-------------------------|-------------------------|
| Mouse P53           | NM_011640.3      | GGCGTAAACGCTTCGAGATG    | TTCAGGTAGCTGGAGTGAGC    |
| Mouse P21           | NM_007669.5      | AGACATTCAGAGCCACAGGC    | CGTCTCCGTGACGAAGTCAA    |
| Mouse P16           | NM_009877.2      | TGGTCACTGTGAGGATTCAGC   | TTGCCATCATCATCACCTGG    |
| Mouse TNF $\alpha$  | NM_013693.3      | GGATGAGAAGTTCCCAAATGGC  | GTTTGCTACGACGTGGGCTA    |
| Mouse NF $\kappa$ B | NM_008689.2      | AACTATGTGGGGCTGCAA      | GTTTGCAAAGCCAACCACCA    |
| Mouse IFN $\alpha$  | NM_010502.2      | TTGATGGCAACCAGTTCAG     | TCATCCAAGCAGCAGATGA     |
| Mouse OAS1B         | NM_001083925.1   | GGGCTCTAAAGGGGTCAAG     | TCAAACCTCACTCCACAACGTC  |
| Mouse STAT1         | NM_001205313.1   | CCTGGAGGTCTTTGTCCCT     | TGCGTTCAGACCTCTCTTGG    |
| Mouse STAT3         | NM_011486.5      | ACCATTGACCTGCCGATGTC    | ACGTGAGCGACTCAAACCTGC   |
| Mouse CXCL10        | NM_021274.2      | CCAAGTGCTGCCGTCATTTTC   | GGCTCGCAGGGATGATTCAA    |
| Mouse MMP13         | NM_008607.2      | TGTTTGAGAGCACTACTTGAA   | CAGTCACCTCTAAGCCAAAGAAA |
| Mouse MMP3          | NM_010809.2      | ACATGGAGACTTTGTCCCTTTTG | TTGGCTGAGTGGTAGAGTCCC   |
| Mouse IGFBP3        | NM_008343.2      | CCAGGAAACATCAGTGAGTCC   | GGATGGAACCTGGAATCGGTCA  |
| Mouse IGFBP4        | NM_010517.4      | AGAAGCCCCTGCGTACATTG    | TTGTTGGGATGTTTCGCTCTCA  |
| Mouse IL6           | NM_001314054.1   | CTCTGCAAGAGACTTCCATCCA  | ACAGGTCTGTTGGGAGTGGT    |
| Mouse C3            | NM_009778.3      | CCAGCTCCCCATTAGCTCTG    | GCACCTGCCTCTTAGGAAGTC   |
| Mouse CP            | NM_001374677.1   | GCACATGGGGTAACGTACACC   | TCATCAGCCCGTTGAAAATCAG  |
| Mouse OAS3          | NM_145226.6      | TTCGCAGAGCTTCGAAGGAA    | TATATCGAGTGACAACCTGGCG  |
| Mouse DPT           | NM_019759.3      | TGGATGGGTGAATCTTAACCGC  | TCAGAGCCTTCCTCTTGCTA    |
| Mouse DCN           | NM_001042651.1   | AGCGAGAGGACTGCCATCTA    | GTGGGTCTTTGTACCTGCTGT   |
| Mouse IFN $\beta$   | NM_010510.1      | CAGCTCCAAGAAAGGACGAAC   | GGCAGTGTAACCTCTTCTGCAT  |
| Mouse ISG15         | NM_015783.3      | AGCAATGGCCTGGGACCTAA    | TAAGACCGTCTGGAGCACT     |
| Mouse MX2           | NM_013606.1      | CACCAGGCTCCGAAAAGAGT    | GGCAATTCTCGTCCACGGTA    |
| Mouse OASL2         | NM_011854.2      | TGCCTGGGAGAGAATCGAGA    | AGCCTCCCTCACCACTTA      |
| Mouse RPLP0         | NM_007475.5      | AACCCTGAAGTGCTCGACAT    | GAAGGCCTTGACCTTTTCAGT   |
| Mouse B2M           | NM_009735.3      | GCTCACAATGAATTCACCCC    | TGTCTCGATCCCAGTAGACG    |
| Mouse CASP4         | NM_007609.3      | TCATGGCTGAAAACAAACACCC  | AAACCCAACGCTTGCTACTG    |
| Mouse IFI44         | NM_133871.2      | TGCACTCTTCTGAGCTGGTG    | CCTCCAGCTTGACTTCACA     |
| Mouse CD74          | NM_001042605.1   | TACTGCTGGTGTGTGTCCC     | CAGGGTGACTTGACCCAGTT    |
| Mouse XAF1          | XM_006533567.3   | ACCAGCAGACCAAGGAAAGC    | ACTTGGAGTGTGATGGGCTG    |
| Mouse RSAD2         | NM_021384.4      | CTGTGCGCTGGAAGGTTTTC    | GCACCAAACAGGACACCTCT    |
| Mouse USP18         | NM_011909.2      | ACACAGACTTGACAGAGCGG    | TGAGCAGTTGCTCCTCTCTG    |

|             |                |                       |                        |
|-------------|----------------|-----------------------|------------------------|
| Human B2M   | NM_004048.3    | CACTGAATTCACCCCCACTGA | TTCAAACCTCCATGATGCTGC  |
| Human OAS3  | NM_006187.4    | CAGAAGCCCAGGCCTATCAT  | ACTTCACACAGCAGCCTTCA   |
| Human CD74  | NM_001025159.2 | GATGCACCTGCTCCAGAATG  | TTTTGCTCCAAGGAGTGCCT   |
| Human CASP4 | NM_001225.4    | CCTATGGCAGAAGGCAACCA  | TCTGCCATGACCCGAAC TTT  |
| Human USP18 | NM_017414.4    | GGCTCCTGAGGCAAATCTGT  | AACCAGGCCATGAGGGTAGT   |
| Human IFI44 | NM_006417.5    | ATCCTCTGAGTGGGAGCTG   | CCTCCCTTAGATTCCCTATTGC |
| Human XAF1  | NM_017523.5    | AGCTCCACGAGTCCTACTGT  | TTCTTTCCCTTTCCCGAGC    |
| Human Actin | NM_007393.3    | TTCTACAATGAGCTGCGTGTG | GGGGTGTGAAGGTCTCAA     |

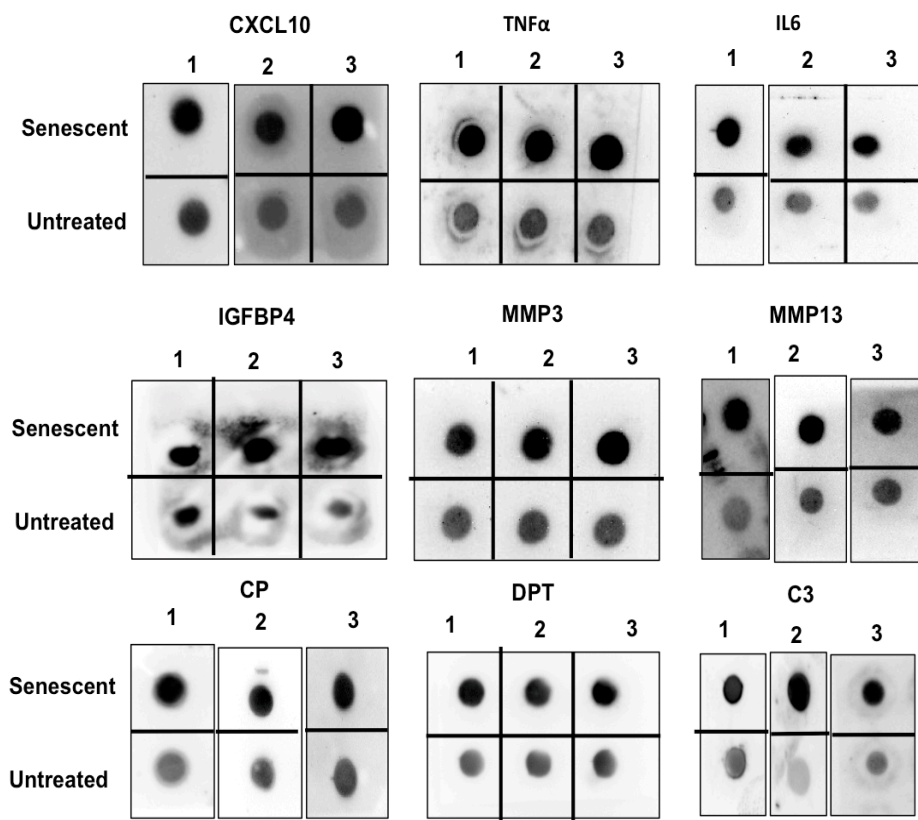

**Figure S1.** Validation of upregulated SASP by dot blot. Dot blot image used for evaluating the fold change in levels of the indicated SASP molecules in conditioned media of in senescent 3T3-L1 preadipocytes compared to untreated control cells. ImageJ quantification was performed for the intensity of the dot of the indicated molecule in conditioned media of senescent preadipocytes compared to untreated cells. Data are means  $\pm$ SEM from 3 independent experiments.  $*P \leq 0.05$  (Student's t-test).

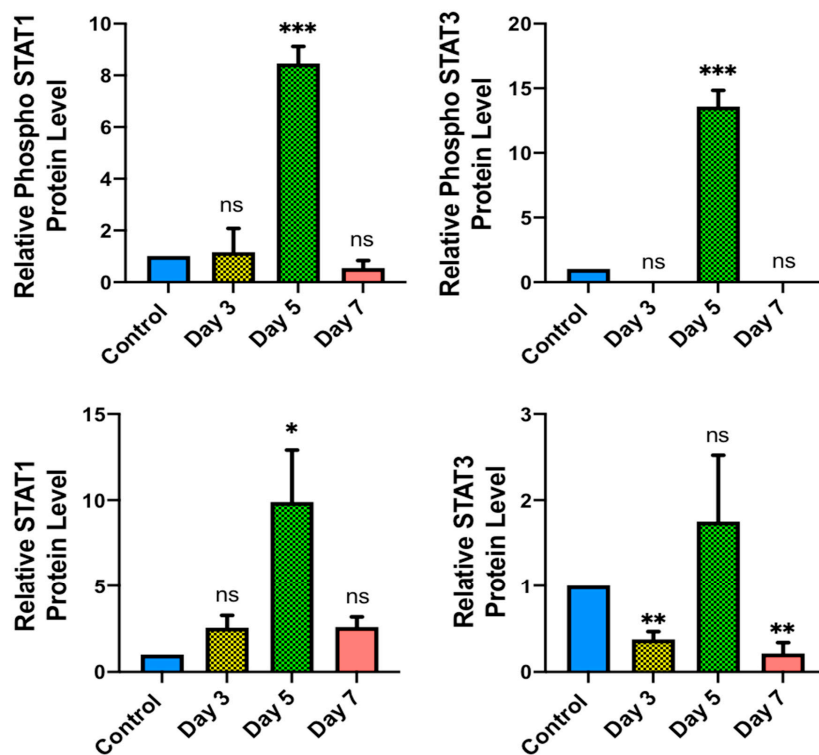

**Figure S2.** STAT1 and STAT3 activation in senescent preadipocytes. Graph showing quantified levels of each corresponding protein at different day 3, da5 and day7, which were normalized to those of actin. Results are represented as means  $\pm$ SEM from three independent experiments. \* $P \leq 0.05$ , \*\* $P \leq 0.01$ , \*\*\* $P \leq 0.001$  (Student's t-test).

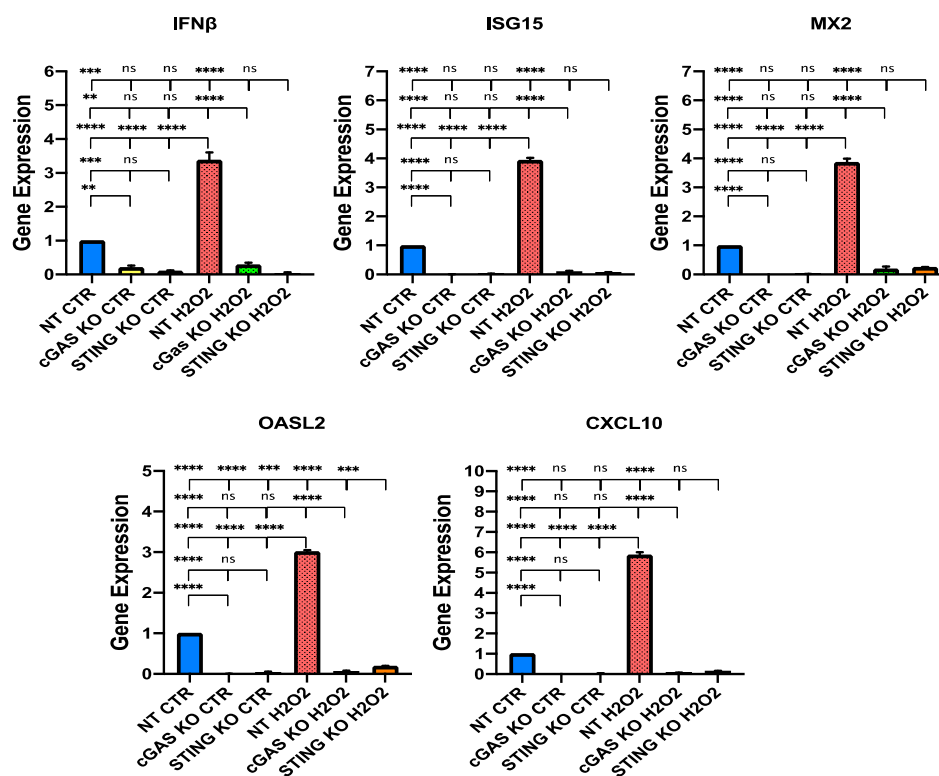

**Figure S3.** cGAS and STING regulates the gene expression of interferon signaling related genes in preadipocytes. Gene expression analysis for interferon signaling related genes (IFN $\beta$ , ISG15, MX2, OASL2 and CXCL10) in untreated NT, cGAS KO, and STING KO preadipocytes vs H<sub>2</sub>O<sub>2</sub> treated counterparts as indicated. Results (Relative expression) are presented as means  $\pm$ SEM from three independent experiments. \*\* $P \leq 0.01$ , \*\*\* $P \leq 0.001$ , \*\*\*\* $P \leq 0.0001$  (ANOVA with post-hoc Tukey test).

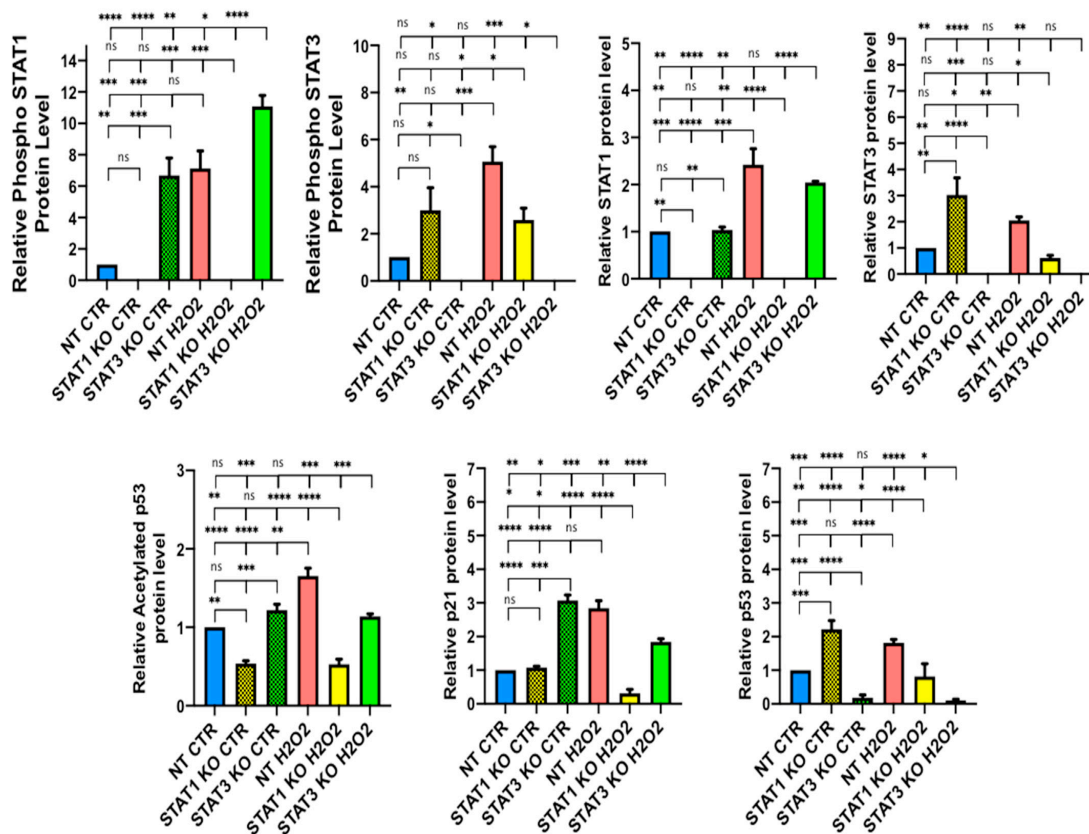

**Figure S4.** Antagonistic functions of STAT1 and STAT3 in regulating growth arrest and cell survival phenotypes in senescent preadipocytes. Graph showing quantified levels of each corresponding protein, which were normalized to those of actin. Results are represented as means  $\pm$ SEM from three independent experiments. \* $P \leq 0.05$ , \*\* $P \leq 0.01$ , \*\*\* $P \leq 0.001$ , \*\*\*\* $P \leq 0.0001$  (ANOVA with post-hoc Tukey test).

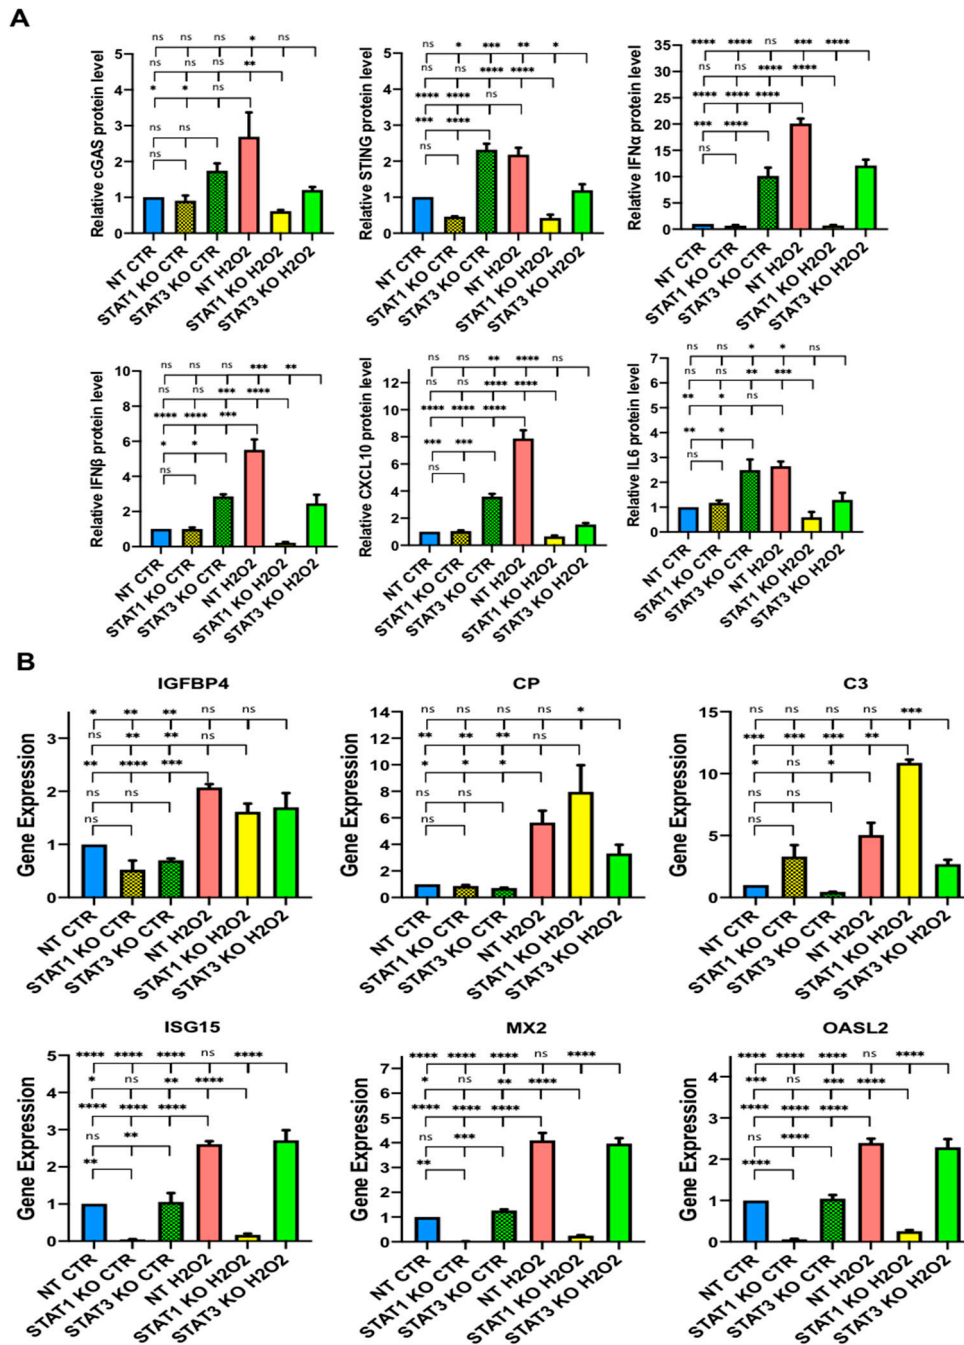

**Figure S5.** STAT1 functionally interacts with cGAS/STING to drive the expression of CXCL10 and antiviral response genes and STAT3 negatively regulates this interaction. (A) Graph showing quantified levels of each corresponding protein, which were normalized to those of actin. Results are represented as means  $\pm$ SEM from three independent experiments. \* $P \leq 0.05$ , \*\* $P \leq 0.01$ , \*\*\* $P \leq 0.001$ , \*\*\*\* $P \leq 0.0001$  (ANOVA with post-hoc Tukey test). (B) Gene expression analysis of most significantly upregulated SASP molecules in untreated NT, STAT1 KO, and STAT3 KO preadipocytes vs H<sub>2</sub>O<sub>2</sub> treated counterparts as indicated. Results (Relative expression) are presented as means  $\pm$ SEM from three independent experiments. \* $P \leq 0.05$ , \*\* $P \leq 0.01$ , \*\*\* $P \leq 0.001$ , \*\*\*\* $P \leq 0.0001$  (ANOVA with post-hoc Tukey test).
